# Supplementary material for: The Origin of Unequal Childhoods: Associations between Caregiver Gender Stereotypes and Early Childhood Development in Rural China
Source: Research Square preprint supplement (doi:10.21203/rs.3.rs-6651508/v1), 2025-11-06
Supplement: Supplementary file 1 [file 15f96653f7b5cc2a604403da.docx]

**Appendix**

| Table A1. The correlation of the gender stereotype on children’s standardized Bayley outcomes | | | | | | | | | | | | | | | | | | | | | | | | | |
| --- | --- | --- | --- | --- | --- | --- | --- | --- | --- | --- | --- | --- | --- | --- | --- | --- | --- | --- | --- | --- | --- | --- | --- | --- | --- |
|  | Standardized cognitive score | Standardized language score | Standardized motor score | Standardized social-emotional score | Standardized cognitive score | Standardized language score | Standardized motor score | Standardized social-emotional score | Standardized cognitive score | Standardized language score | Standardized motor score | Standardized social-emotional score | Standardized cognitive score | Standardized language score | Standardized motor score | Standardized social-emotional score | Standardized cognitive score | Standardized language score | Standardized motor score | Standardized social-emotional score | Standardized cognitive score | Standardized language score | Standardized motor score | Standardized social-emotional score |
| VARIABLES | (1) | (2) | (3) | (4) | (5) | (6) | (7) | (8) | (9) | (10) | (11) | (12) | (13) | (14) | (15) | (16) | (17) | (18) | (19) | (20) | (21) | (22) | (23) | (24) |
| ***Panel A. The correlation of the gender stereotype on boys’ development*** | | | | | | | | | | | | | | | | | | | | | | | | | |
| Boys are better at math than girls. | 0.012 | 0.021 | 0.094 | -0.026 |  |  |  |  |  |  |  |  |  |  |  |  |  |  |  |  |  |  |  |  |
|  | (0.052) | (0.055) | (0.059) | (0.056) |  |  |  |  |  |  |  |  |  |  |  |  |  |  |  |  |  |  |  |  |
| College education is more important for boys than girls. |  |  |  |  | -0.042 | -0.065 | 0.024 | -0.054 |  |  |  |  |  |  |  |  |  |  |  |  |  |  |  |  |
|  |  |  |  |  | (0.051) | (0.052) | (0.057) | (0.060) |  |  |  |  |  |  |  |  |  |  |  |  |  |  |  |  |
| When jobs are scarce, men deserve them more. |  |  |  |  |  |  |  |  | 0.066 | 0.028 | 0.129* | 0.044 |  |  |  |  |  |  |  |  |  |  |  |  |
|  |  |  |  |  |  |  |  |  | (0.055) | (0.062) | (0.060) | (0.064) |  |  |  |  |  |  |  |  |  |  |  |  |
| Men are career-oriented and women family-oriented. |  |  |  |  |  |  |  |  |  |  |  |  | -0.019 | -0.039 | 0.055 | -0.001 |  |  |  |  |  |  |  |  |
|  |  |  |  |  |  |  |  |  |  |  |  |  | (0.059) | (0.060) | (0.059) | (0.062) |  |  |  |  |  |  |  |  |
| A good husband is more important than a good career. |  |  |  |  |  |  |  |  |  |  |  |  |  |  |  |  | -0.021 | 0.004 | -0.052 | 0.015 |  |  |  |  |
|  |  |  |  |  |  |  |  |  |  |  |  |  |  |  |  |  | (0.054) | (0.058) | (0.056) | (0.062) |  |  |  |  |
| Women should continue the family line by bearing a son. |  |  |  |  |  |  |  |  |  |  |  |  |  |  |  |  |  |  |  |  | 0.023 | -0.026 | -0.017 | 0.037 |
|  |  |  |  |  |  |  |  |  |  |  |  |  |  |  |  |  |  |  |  |  | (0.047) | (0.052) | (0.054) | (0.051) |
| Control variables | YES | YES | YES | YES | YES | YES | YES | YES | YES | YES | YES | YES | YES | YES | YES | YES | YES | YES | YES | YES | YES | YES | YES | YES |
| Constant | 0.479 | -0.335 | -0.656 | -0.488 | 0.623 | -0.103 | -0.407 | -0.440 | 0.318 | -0.351 | -0.739 | -0.708 | 0.579 | -0.135 | -0.531 | -0.573 | 0.559 | -0.273 | -0.246 | -0.605 | 0.467 | -0.211 | -0.312 | -0.652 |
|  | (0.493) | (0.517) | (0.510) | (0.579) | (0.491) | (0.509) | (0.524) | (0.564) | (0.504) | (0.538) | (0.527) | (0.580) | (0.507) | (0.536) | (0.541) | (0.584) | (0.495) | (0.500) | (0.507) | (0.542) | (0.485) | (0.495) | (0.509) | (0.546) |
|  |  |  |  |  |  |  |  |  |  |  |  |  |  |  |  |  |  |  |  |  |  |  |  |  |
| Observations | 308 | 308 | 308 | 308 | 308 | 308 | 308 | 308 | 308 | 308 | 308 | 308 | 308 | 308 | 308 | 308 | 308 | 308 | 308 | 308 | 308 | 308 | 308 | 308 |
| R-squared | 0.079 | 0.035 | 0.054 | 0.036 | 0.081 | 0.038 | 0.046 | 0.038 | 0.084 | 0.035 | 0.061 | 0.037 | 0.080 | 0.036 | 0.048 | 0.035 | 0.080 | 0.034 | 0.048 | 0.035 | 0.080 | 0.035 | 0.046 | 0.037 |
| ***Panel B. The correlation of the gender stereotype on girls’ development*** | | | | | | | | | | | | | | | | | | | | | | | | | |
| Boys are better at math than girls. | 0.009 | -0.073 | 0.081 | -0.151** |  |  |  |  |  |  |  |  |  |  |  |  |  |  |  |  |  |  |  |  |
|  | (0.058) | (0.053) | (0.052) | (0.053) |  |  |  |  |  |  |  |  |  |  |  |  |  |  |  |  |  |  |  |  |
| College education is more important for boys than girls. |  |  |  |  | 0.057 | 0.029 | 0.044 | -0.110† |  |  |  |  |  |  |  |  |  |  |  |  |  |  |  |  |
|  |  |  |  |  | (0.065) | (0.052) | (0.055) | (0.065) |  |  |  |  |  |  |  |  |  |  |  |  |  |  |  |  |
| When jobs are scarce, men deserve them more. |  |  |  |  |  |  |  |  | 0.024 | 0.009 | 0.027 | -0.107* |  |  |  |  |  |  |  |  |  |  |  |  |
|  |  |  |  |  |  |  |  |  | (0.064) | (0.054) | (0.057) | (0.054) |  |  |  |  |  |  |  |  |  |  |  |  |
| Men are career-oriented and women family-oriented. |  |  |  |  |  |  |  |  |  |  |  |  | -0.054 | -0.088 | -0.028 | -0.096 |  |  |  |  |  |  |  |  |
|  |  |  |  |  |  |  |  |  |  |  |  |  | (0.058) | (0.055) | (0.055) | (0.061) |  |  |  |  |  |  |  |  |
| A good husband is more important than a good career. |  |  |  |  |  |  |  |  |  |  |  |  |  |  |  |  | 0.038 | -0.087† | -0.023 | -0.107* |  |  |  |  |
|  |  |  |  |  |  |  |  |  |  |  |  |  |  |  |  |  | (0.059) | (0.048) | (0.055) | (0.053) |  |  |  |  |
| Women should continue the family line by bearing a son. |  |  |  |  |  |  |  |  |  |  |  |  |  |  |  |  |  |  |  |  | -0.100† | -0.072 | -0.023 | -0.105* |
|  |  |  |  |  |  |  |  |  |  |  |  |  |  |  |  |  |  |  |  |  | (0.054) | (0.049) | (0.052) | (0.053) |
| Control variables | YES | YES | YES | YES | YES | YES | YES | YES | YES | YES | YES | YES | YES | YES | YES | YES | YES | YES | YES | YES | YES | YES | YES | YES |
| Constant | 0.063 | -0.324 | -0.637 | -0.217 | -0.111 | -0.667 | -0.528 | -0.324 | 0.005 | -0.596 | -0.467 | -0.326 | 0.240 | -0.323 | -0.292 | -0.455 | -0.060 | -0.219 | -0.278 | -0.291 | 0.390 | -0.348 | -0.302 | -0.404 |
|  | (0.643) | (0.710) | (0.596) | (0.666) | (0.663) | (0.698) | (0.594) | (0.698) | (0.659) | (0.718) | (0.626) | (0.671) | (0.637) | (0.692) | (0.610) | (0.646) | (0.681) | (0.698) | (0.612) | (0.697) | (0.617) | (0.699) | (0.604) | (0.641) |
|  |  |  |  |  |  |  |  |  |  |  |  |  |  |  |  |  |  |  |  |  |  |  |  |  |
| Observations | 260 | 260 | 260 | 260 | 260 | 260 | 260 | 260 | 260 | 260 | 260 | 260 | 260 | 260 | 260 | 260 | 260 | 260 | 260 | 260 | 260 | 260 | 260 | 260 |
| R-squared | 0.017 | 0.047 | 0.037 | 0.073 | 0.020 | 0.041 | 0.031 | 0.057 | 0.018 | 0.040 | 0.030 | 0.058 | 0.020 | 0.050 | 0.030 | 0.056 | 0.019 | 0.051 | 0.030 | 0.060 | 0.029 | 0.048 | 0.030 | 0.061 |
| Robust standard errors in parentheses | | | | | | | | | | | | | | | | | | | | | | | | | |
| *** p<0.001, ** p<0.01, * p<0.05, † p<0.1 | | | | | | | | | | | | | | | | | | | | | | | | | |

| Table A2. The correlation of the gender stereotype on primary caregiver’s parenting behavior | | | | | | | | | | | | | | | | | | | | |
| --- | --- | --- | --- | --- | --- | --- | --- | --- | --- | --- | --- | --- | --- | --- | --- | --- | --- | --- | --- | --- |
|  | Parenting knowledge z-score | | Family care indicators z-score | Variety of play materials z-score | Parenting knowledge z-score | Family care indicators z-score | Variety of play materials z-score | Parenting knowledge z-score | Family care indicators z-score | Variety of play materials z-score | Parenting knowledge z-score | Family care indicators z-score | Variety of play materials z-score | Parenting knowledge z-score | Family care indicators z-score | Variety of play materials z-score | Parenting knowledge z-score | Family care indicators z-score | Variety of play materials z-score | |
| VARIABLES | (1) | | (2) | (3) | (4) | (5) | (6) | (7) | (8) | (9) | (10) | (11) | (12) | (13) | (14) | (15) | (16) | (17) | (18) | |
| ***Panel A. The correlation of the gender stereotype on primary caregiver’s parenting behavior of boys*** | | | | | | | | | | | | | | | | | | | | |
| Boys are better at math than girls. | -0.069† | | 0.008 | 0.029 |  |  |  |  |  |  |  |  |  |  |  |  |  |  |  | |
|  | (0.041) | | (0.044) | (0.039) |  |  |  |  |  |  |  |  |  |  |  |  |  |  |  | |
| College education is more important for boys than girls. |  | |  |  | -0.210*** | -0.126** | -0.055 |  |  |  |  |  |  |  |  |  |  |  |  | |
|  |  | |  |  | (0.041) | (0.043) | (0.040) |  |  |  |  |  |  |  |  |  |  |  |  | |
| When jobs are scarce, men deserve them. |  | |  |  |  |  |  | -0.063 | 0.010 | 0.002 |  |  |  |  |  |  |  |  |  | |
|  |  | |  |  |  |  |  | (0.044) | (0.047) | (0.042) |  |  |  |  |  |  |  |  |  | |
| Men are career-oriented and women family-oriented. |  | |  |  |  |  |  |  |  |  | -0.162*** | -0.069 | -0.012 |  |  |  |  |  |  | |
|  |  | |  |  |  |  |  |  |  |  | (0.044) | (0.045) | (0.036) |  |  |  |  |  |  | |
| A good husband is more important than a good career. |  | |  |  |  |  |  |  |  |  |  |  |  | -0.047 | -0.050 | -0.013 |  |  |  | |
|  |  | |  |  |  |  |  |  |  |  |  |  |  | (0.042) | (0.044) | (0.038) |  |  |  | |
| Women should continue the family line by bearing a son. |  | |  |  |  |  |  |  |  |  |  |  |  |  |  |  | -0.071† | -0.018 | -0.004 | |
|  |  | |  |  |  |  |  |  |  |  |  |  |  |  |  |  | (0.040) | (0.045) | (0.039) | |
| Control variables | YES | | YES | YES | YES | YES | YES | YES | YES | YES | YES | YES | YES | YES | YES | YES | YES | YES | YES | |
| Constant | 0.372 | | 0.329 | -0.236 | 0.694† | 0.677 | -0.005 | 0.361 | 0.324 | -0.152 | 0.651 | 0.567 | -0.106 | 0.259 | 0.465 | -0.116 | 0.320 | 0.397 | -0.135 | |
|  | (0.423) | | (0.508) | (0.426) | (0.409) | (0.461) | (0.413) | (0.411) | (0.531) | (0.442) | (0.401) | (0.465) | (0.406) | (0.396) | (0.492) | (0.414) | (0.387) | (0.488) | (0.412) | |
|  |  | |  |  |  |  |  |  |  |  |  |  |  |  |  |  |  |  |  | |
| Observations | 354 | | 354 | 354 | 354 | 354 | 354 | 354 | 354 | 354 | 354 | 354 | 354 | 354 | 354 | 354 | 354 | 354 | 354 | |
| R-squared | 0.288 | | 0.188 | 0.147 | 0.337 | 0.206 | 0.151 | 0.287 | 0.188 | 0.146 | 0.316 | 0.193 | 0.146 | 0.285 | 0.191 | 0.146 | 0.290 | 0.188 | 0.146 | |
| ***Panel B. The correlation of the gender stereotype on primary caregiver’s parenting behavior of girls*** | | | | | | | | | | | | | | | | | | | | |
| Boys are better at math than girls. | | -0.152*** | -0.112* | -0.123** |  |  |  |  |  |  |  |  |  |  |  |  |  |  |  | |
|  | | (0.041) | (0.049) | (0.043) |  |  |  |  |  |  |  |  |  |  |  |  |  |  |  | |
| College education is more important for boys than girls. | |  |  |  | -0.172*** | -0.122* | -0.093† |  |  |  |  |  |  |  |  |  |  |  |  | |
|  | |  |  |  | (0.048) | (0.058) | (0.047) |  |  |  |  |  |  |  |  |  |  |  |  | |
| When jobs are scarce, men deserve them. | |  |  |  |  |  |  | -0.163*** | -0.028 | -0.030 |  |  |  |  |  |  |  |  |  | |
|  | |  |  |  |  |  |  | (0.040) | (0.057) | (0.051) |  |  |  |  |  |  |  |  |  | |
| Men are career-oriented and women family-oriented. | |  |  |  |  |  |  |  |  |  | -0.192*** | -0.134** | -0.094* |  |  |  |  |  |  | |
|  | |  |  |  |  |  |  |  |  |  | (0.046) | (0.051) | (0.043) |  |  |  |  |  |  | |
| A good husband is more important than a good career. | |  |  |  |  |  |  |  |  |  |  |  |  | -0.186*** | -0.138** | -0.094* |  |  |  | |
|  | |  |  |  |  |  |  |  |  |  |  |  |  | (0.041) | (0.050) | (0.041) |  |  |  | |
| Women should continue the family line by bearing a son. | |  |  |  |  |  |  |  |  |  |  |  |  |  |  |  | -0.118** | -0.075 | -0.063 | |
| Boys are better at math than girls. | |  |  |  |  |  |  |  |  |  |  |  |  |  |  |  | (0.038) | (0.049) | (0.042) | |
| Control variables | | YES | YES | YES | YES | YES | YES | YES | YES | YES | YES | YES | YES | YES | YES | YES | YES | YES | YES | |
| Constant | | 0.778 | 0.190 | 0.540 | 0.908† | 0.273 | 0.484 | 0.839 | -0.062 | 0.259 | 0.836â | 0.213 | 0.419 | 0.979† | 0.343 | 0.498 | 0.700 | 0.095 | 0.370 | |
|  | | (0.499) | (0.708) | (0.561) | (0.495) | (0.658) | (0.530) | (0.510) | (0.692) | (0.565) | (0.500) | (0.683) | (0.547) | (0.499) | (0.716) | (0.565) | (0.516) | (0.678) | (0.538) | |
|  | |  |  |  |  |  |  |  |  |  |  |  |  |  |  |  |  |  |  | |
| Observations | | 307 | 307 | 307 | 307 | 307 | 307 | 307 | 307 | 307 | 307 | 307 | 307 | 307 | 307 | 307 | 307 | 307 | 307 | |
| R-squared | | 0.205 | 0.131 | 0.135 | 0.207 | 0.131 | 0.123 | 0.210 | 0.119 | 0.114 | 0.225 | 0.136 | 0.126 | 0.227 | 0.140 | 0.127 | 0.198 | 0.125 | 0.120 | |
| Robust standard errors in parentheses | | | | | | | | | | | | | | | | | | | |
| *** p<0.001, ** p<0.01, * p<0.05, † p<0.1 | | | | | | | | | | | | | | | | | | | | |
